# Supplementary figures and images for: Rumen bacterial communities can be acclimated faster to high concentrate diets than currently implemented feedlot programs
Source: PubMed Central journal article supplement — J Appl Microbiol. 2016 Feb 12;120(3):588–99. doi: 10.1111/jam.13039 (PMC4785609; doi:10.1111/jam.13039), 2016-02-12

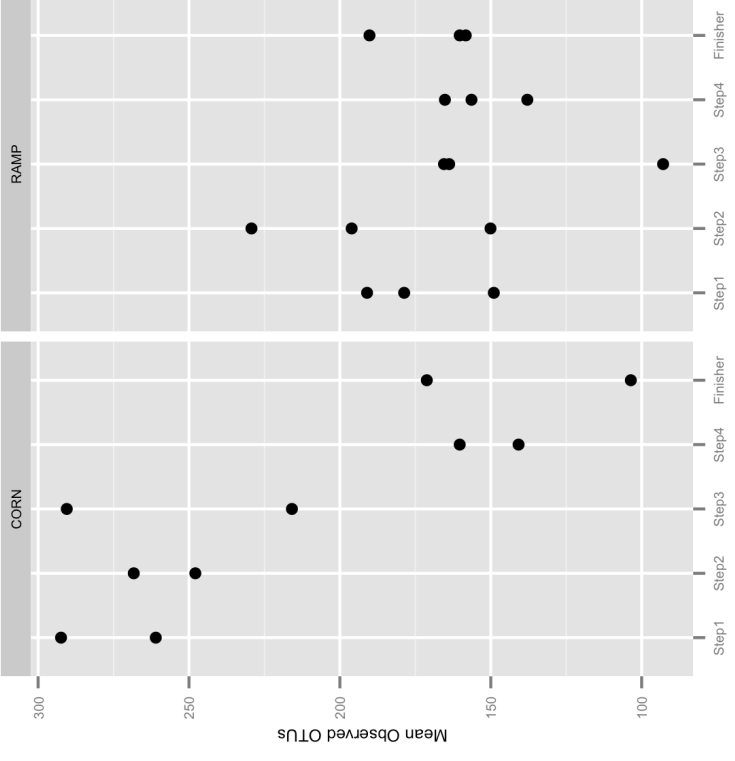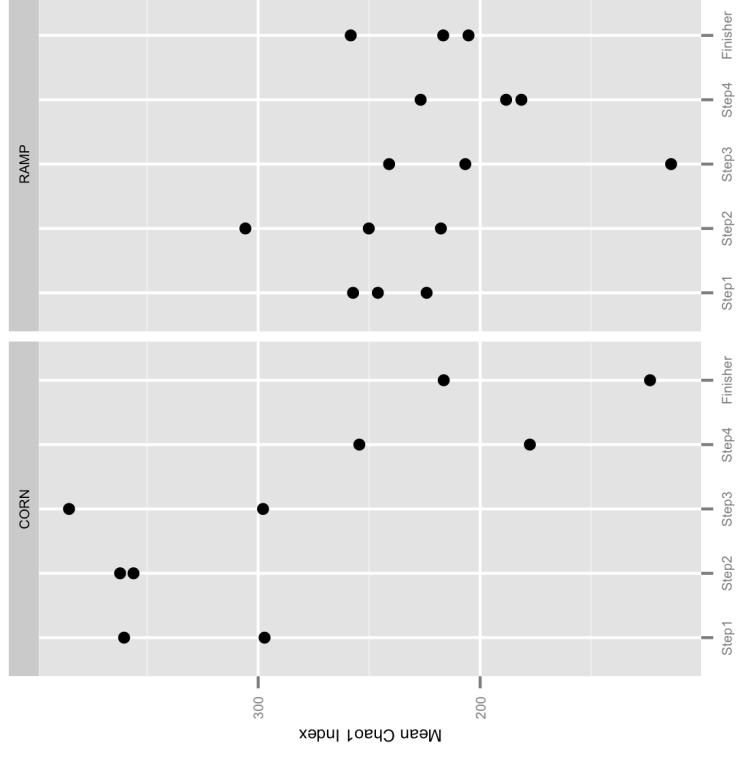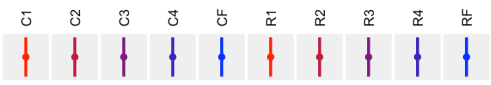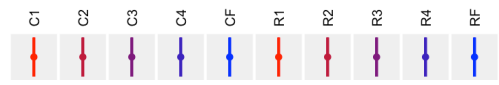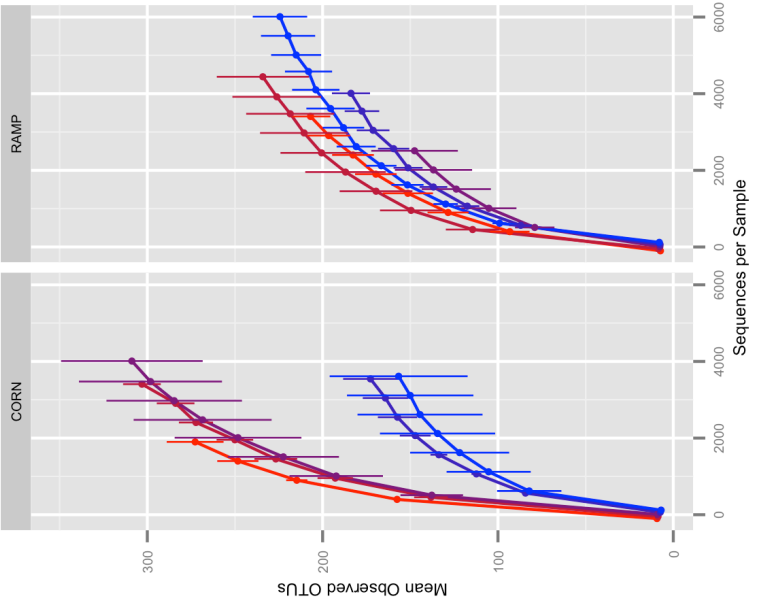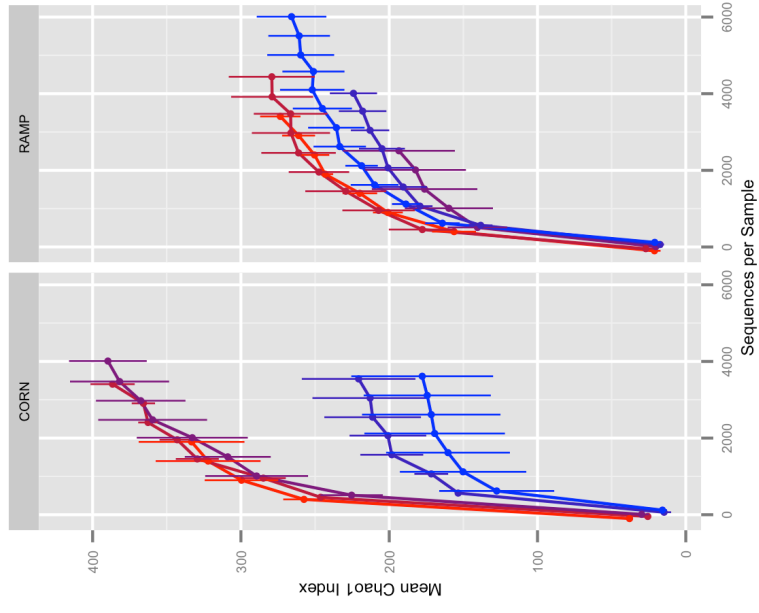

Supplement: JAM-120-588-s002.pdf [file JAM-120-588-s002.pdf]
